# Supplementary material for: Understanding the effect of a virtual moderator on people’s perception in remote discussion using social VR
Source: Frontiers journal article supplement (doi:10.3389/frvir.2023.1198024), 2023-07-18
Supplement: Data_Sheet_2.pdf [file Data_Sheet_2.pdf]

### 1. Psychological safety (higher means high safety)

1. If you make a mistake in this group, it is often held against you. \*
2. Members of this group are able to bring up problems and tough issues.
3. People in this group sometimes reject others for being different.\*
4. It is safe to take a risk in this group.
5. It is difficult to ask other members of this group for help.\*
6. No one in this group would deliberately act in a way that undermines my efforts.
7. Working with members of this group, my unique skills and talents are valued and utilized.

Each item was followed by a 7-point response scale that was anchored by  
1 = absolutely disagree, and 7 = strongly agree.

\*: The scores marked are counted as reversed scores.

### 2. Perceived degree of self-disclosure (higher means high self-disclosure)

1. How much did you tell the group about yourself?
2. How much personal or intimate information did you share with the group?
3. How honest and open do you think you were in the group's responses?
4. How much knowledge do you think the group gained about you?

Each item was followed by a 7-point response scale that was anchored by  
1 = not at all, and 7 = a great deal.

### 3. Sense of co-presence

1. I often felt as if the group and I were in the same room together.
2. I was often aware of the group in the room.
3. I hardly noticed the group in the room\*
4. I often felt as if we were in different places rather than together in the same room\*

Each item was followed by a 7-point response scale that was anchored by  
1 = absolutely disagree, and 7 = strongly agree.

\*: The scores marked are counted as reversed scores.
